# Supplementary material for: Constitutively active STING causes neuroinflammation and degeneration of dopaminergic neurons in mice
Source: eLife journal article supplement (doi:10.7554/elife.81943), 2022-10-31
Supplement: supp [file elife-81943-supp-v1.zip]

Archive with 12 entries (12 files):
- elife_poa_e81943_Figure_1_figure_supplement_1.pdf
- elife_poa_e81943_Figure_2_figure_supplement_1.pdf
- elife_poa_e81943_Figure_3_figure_supplement_1.pdf
- elife_poa_e81943_Figure_4_figure_supplement_1.pdf
- elife_poa_e81943_Figure_5_figure_supplement_1.pdf
- elife_poa_e81943_Figure_6_figure_supplement_1.pdf
- elife_poa_e81943_Figure_7_figure_supplement_1.pdf
- elife_poa_e81943_Figure_7_figure_supplement_2.pdf
- elife_poa_e81943_Figure_9_figure_supplement_1.pdf
- elife_poa_e81943_Source_data_1.xlsx
- elife_poa_e81943_Figure_6_figure_supplement_1_source_data_1.zip
- elife_poa_e81943_Figure_3_figure_supplement_1_source_data_1.zip
