# Supplementary material for: Constitutively active STING causes neuroinflammation and degeneration of dopaminergic neurons in mice
Source: eLife journal article supplement (doi:10.7554/elife.81943), 2022-10-31
Supplement: supp [file elife-81943-supp-v1.zip › elife_poa_e81943_Source_data_1.xlsx]

## Sheet: Figure 1
Szegö et al,	Constitutively active STING causes neuroinflammation and degeneration of dopaminergic neurons in mice
Figure 1.	C	STING WT	STING ki		Adult mice, normalized Iba1 area fraction
		0.704649	9.35809
		0.557271	8.5939
		0.494232	8.51774
		1.28299	9.07628
		1.96086	8.2372
	D	STING WT	STING ki		Adult mice, normalized GFAP area fraction
		0.82963	21.7676
		0.753567	16.5301
		1.44639	20.6918
		1.06629	30.1291
		0.904117	46.1382
	G	STING WT	STING ki		Adult mice, normalized TH-neuron number
		0.995725	0.913354
		1.05085	0.944299
		1.01704	0.993428
		0.9376	0.891023
		0.998788	0.900457
	H	STING WT	STING ki
		0.911896	0.791805		Adult mice, normalized TH-fiber density
		1.07728	0.860803
		1.12804	0.718208
		0.900597	0.76883
		0.98219	0.89654
	I	STING WT	STING ki		Adult mice, normalized striatal dopamine
		1.38176	0.539134
		0.860457	0.679038
		1.12816	0.329298
		1.01059	0.899827
		0.619034	0.669725

## Sheet: Figure 2
Szegö et al,	Constitutively active STING causes neuroinflammation and degeneration of dopaminergic neurons in mice
Figure 2.	C	STING WT	STING ki		Juvenile mice, normalized Iba1 area fraction
		1.15855	2.1772
		0.870401	2.57201
		0.990932	2.31849
		0.982045	2.28907
		0.998074	2.96523
			3.09791
	D	STING WT	STING ki		Juvenile mice, normalized GFAP area fraction
		1.41062	15.5529
		1.25521	14.838
		0.900183	17.3291
		0.158681	11.6987
		1.27531	15.8315
			12.0298
	G	STING WT	STING ki		Juvenile mice, normalized TH-neuron number
		0.985425	1.00551
		1.10638	0.980036
		0.958656	0.943329
		0.978566	0.914565
		0.970973	1.00551
			1.02614
	H	STING WT	STING ki
		0.997878	0.996826		Juvenile mice, normalized TH-fiber density
		1.00407	0.977393
		0.958729	1.05843
		1.08607	0.964084
		0.953252	0.911692
			0.881214
	I	STING WT	STING ki		Juvenile mice, normalized striatal dopamine
		0.866236	1.07496
		1.24324	0.787113
		0.929457	1.08387
		1.072	0.840988
		0.889076	1.03537
			0.687552

## Sheet: Figure 3
Szegö et al,	Constitutively active STING causes neuroinflammation and degeneration of dopaminergic neurons in mice
		SN		STR
Figure 3.	B	STING WT	STING ki	STING WT	STING ki		Adult mice, normalized paSyn/aSyn ratio, WB, Triton X-100 soluble fraction
		0.415344	341.449	1.50474	51.099
		1.03846	463.637	0.843315	62.1002
		0.341313	534.539	0.606646	12.6752
		1.08193	461.823	0.937682	38.8781
		2.12296	499.108	1.10762	115.488
		SN		STR
	D	STING WT	STING ki	STING WT	STING ki		Adult mice, normalized aSyn/bIII tubulin ratio, WB, Triton X-100 insoluble fraction
		5.23352e-05	1.16058	0.000644395	0.95709
		0.00106239	1.04466	0.0017935	0.988635
		0.000181114	1.01494	0.00636544	1.01733
		0.00351147	1.13503	0.00312624	1.19827
		0.000935803	0.885429	0.00132431	0.922719
		0.00578701	0.75936	0.00458644	0.915953
	F	STING WT	STING Tg				Adult mice, normlized ThioS-positive cell number
		0.962746	1.24351
		0.662082	1.57364
		1.85972	1.80033
		0.856415	2.33039
		0.659041	1.87468
	H	STING WT	STING Tg
		1.04751	0.907764				Adult mice, normlized synapsin density
		1.01158	0.857848
		0.914399	0.814214
		0.97702	0.966617
		1.0495	0.8147
	I	STING WT	STING Tg				Adult mice, normlized homer density
		1.00334	1.011
		1.00088	0.989989
		0.95583	0.90065
		0.997928	0.886584
		1.04202	0.781945

## Sheet: Figure 4
Szegö et al,	Constitutively active STING causes neuroinflammation and degeneration of dopaminergic neurons in mice
Figure 4.	A	STING WT	STING ki		Adult mice, Substantia nigra, expression of Ifi44
		0.064098	2.4375
		0.0264988	3.12614
		3.573	7.1025
		0.266669	0.48887
		1.06974
	B	STING WT	STING ki		Adult mice, Substantia nigra, expression of Mx-1
		0.0558164	0.131333
		0.0028514	0.0687611
		3.70188	0.434501
		0.0859945	0.00624669
		1.15346
	C	STING WT	STING Tg		Adult mice, Substantia nigra, expression of Sting1
		0.05979	0.8888
		0.147732	2.20426
		3.60275	1.09734
		0.439156	0.165037
		0.750571
	D	STING WT	STING Tg
		0.51353	4.84329		Adult mice, Substantia nigra, expression of Tnfa
		1.93941	5.49014
		0.37609	3.09964
		0.240146	0.459854
		2.39624
	E	STING WT	STING Tg		Adult mice, Substantia nigra, expression of Il-1b
		0.365569	41.681
		0.0980199	160.145
		0.236977	24.628
		4.53895	10.5858
		1.47403
	F	STING WT	STING Tg		Adult mice, Substantia nigra, expression of Casp1
		1.06545	8.07283
		0.847489	12.7233
		1.02451	6.06333
		1.75643	5.52972
		0.306125
	G	STING WT	STING Tg		Adult mice, striatum, expression of Ifi44
		0.071898	11.6608
		1.61356	14.7059
		1.31454	25.8895
			15.1923
	H	STING WT	STING Tg		Adult mice, striatum, expression of Mx-1
		0.051846	56.2519
		1.7497	60.7196
		1.19845	148.026
			83.9286
	I	STING WT	STING Tg		Adult mice, striatum, expression of Sting1
		0.173301	2.69011
		2.71609	5.27794
		0.110611	6.27554
			4.47337
	J	STING WT	STING Tg		Adult mice, striatum, expression of Tnfa
		0.0208276	3.78351
		0.487128	6.10494
		2.49204	14.7026
			5.26171
	K	STING WT	STING Tg		Adult mice, striatum, expression of Il-1b
		0.116274	75.1325
		1.47241	127.072
		1.41132	206.792
			49.2716
	L	STING WT	STING Tg		Adult mice, striatum, expression of Casp1
		0.9085	7.62175
		1.5121	4.59583
		0.579399	5.12106
			5.49807
			4.20643

## Sheet: Figure 5
Szegö et al,	Constitutively active STING causes neuroinflammation and degeneration of dopaminergic neurons in mice
		5 weeks		20 weeks
Figure 5.	C	STING WT	STING ki	STING WT	STING ki		Juvenile and adult mice, normalized pSTAT3-positive nuclei
		0.666667	2.11111	0.111111	9.22222
		0.444444	2.33333	0.444444	10.3333
		0.777778	1.66667	0.555556	6.55556
		0.388889	2.33333	0.555556	3.5
		0.592593	2.51852	0.666667	4.51852
		5 weeks		20 weeks
	D	STING WT	STING ki	STING WT	STING ki		Juvenile and adult mice, normalized NF-kB-positive nuclei
		0.731707	2.92683	0.548781	4.5
		0	2.4878	0	3.65854
		1.09756	2.19512	0.731707	3.47561
		1.46341	2.56098	1.64634	5.85366
		1.70732	4.14634	1.70732	3.41463

## Sheet: Figure 6
Szegö et al,	Constitutively active STING causes neuroinflammation and degeneration of dopaminergic neurons in mice
		Ctrl.		Ifnar1-/-		Casp1-/-
Figure 6.	B	STING WT	STING ki	STING WT	STING ki	STING WT	STING ki		Adult mice with Bl6, Ifnar1-/- or Casp1-/- background, nuclear IRF3 levels normalized to HDAC1, WB, nuclear fraction
		1.81069	73.3522	1.85543	76.1793	5.41341	33.9879
		0.647866	69.1213	4.0577	108.159	2.12579	43.4242
		1.15133	96.708	4.3004	93.8281	2.06386	33.4512
		0.390117	41.4635	1.44098	45.7664	0.945804	12.4733
		Ctrl.		Ifnar1-/-		Casp1-/-
	D	STING WT	STING ki	STING WT	STING ki	STING WT	STING ki		Adult mice with Bl6, Ifnar1-/- or Casp1-/- background, normalized NLRP3/bIII tubulin ratio, WB
		0.300699	11.6118	2.14933	10.3277	2.50823	4.92802
		1.6993	10.425	1.80503	10.6902	1.99029	3.2274
		0.72092	3.25542	2.22643	5.36457	1.03511	1.81861
		1.27908	5.33114	1.09288	4.70272	1.06479	1.53932
		Ctrl.		Ifnar1-/-		Casp1-/-
	E	STING WT	STING ki	STING WT	STING ki	STING WT	STING ki		Adult mice with Bl6, Ifnar1-/- or Casp1-/- background, normalized IL1b/Pro-IL1b ratio, WB
		0.0855675	10.996	3.80684	9.88106	1.02519	0.023911
		1.91443	9.09927	2.96732	6.41927	0.217615	0.0262957
		0.445778	12.9659	2.61008	15.0534	0.979915	0.843482
		1.55422	12.2032	3.03557	11.3946	0.425784	0.778544
		Ctrl.		Ifnar1-/-		Casp1-/-
	G	STING WT	STING ki	STING WT	STING ki	STING WT	STING ki		Adult mice with Bl6, Ifnar1-/- or Casp1-/- background, ASC area fraction within Iba1-positive cells
		1.44286	17.9273	1.3013	27.1331	0.17987	0.328571
		0.52987	13.8539	0.506494	18.2578	0.194805	0.286364
		1.04546	14.8065	0.933117	24.0565	0.0733766	0.102597
		1.40844	16.2507	0.637013	22.3364	0.220779	0.2
		0.573377			20.2058	0.227273
		Ctrl.		Ifnar1-/-		Casp1-/-
	H	STING WT	STING ki	STING WT	STING ki	STING WT	STING ki		Adult mice with Bl6, Ifnar1-/- or Casp1-/- background, number of ASC dots within Iba1-positive cells
		0.923077	9.95	1.61538	10.6	0.166667	0.714286
		0.714286	8.15	1.58333	11.7	0.384615	1.26667
		0.857143	8.7	0.8	7.3	0.333333	0.384615
		0.714286	5.95	0.941176	9.85	0.181818	0.454545
		0.6				0.333333
		Ctrl.		Ifnar1-/-		Casp1-/-
	I	STING WT	STING ki	STING WT	STING ki	STING WT	STING ki		Adult mice with Bl6, Ifnar1-/- or Casp1-/- background, number of ASC dots within GFAP-positive cells
		0.222222	0.333333	0.833333	1.95	0.2	0.363636
		0.125	1.8	0.285714	2.1	0.272727	0.166667
		0.125	1.85	0.307692	2.95	0.181818	0.272727
		0.142857	1.68421	0.454545	0.9	0.0909091	0.5
		0.333333				0.363636

## Sheet: Figure 7
Szegö et al,	Constitutively active STING causes neuroinflammation and degeneration of dopaminergic neurons in mice
Figure 7.	A	Data for Principal Component Analysis - z-scores
		STING WT						STING ki						Ifnar1-/- STING WT						Ifnar1-/- STING ki						Casp1-/- STING WT						Casp1-/- STING ki
	IFNa	-0.0482693	-0.556259	-0.136877	-1.19056	-1.18782	0.0437043	0.983454	0.443557		0.858234			-1.53821	0.300354	0.684124	0.755923			1.48195	0.433327	1.38173	0.987984	1.40778		-0.586703	-1.03396	-1.64137	0.223133	1.76804		-0.595271	-0.952841	0.359422	-1.22101	-1.42355
	IFNg	0.430154	0.851899	0.452363	-1.1687	-1.30433	-0.0186463	0.475913	1.0044		0.255987			-1.8612	-0.49599	0.251621	0.41007			1.61253	0.475913	1.37598	0.950739	1.05381		-0.160118	-1.18981	-2.02083	0.260188	1.24091		0.338097	-0.936362	0.379871	-1.22598	-1.43848
	TNFa	0.996767	1.7329	0.672299	-0.133919	-0.240345	0.271583	0.269542	1.48508		1.19154			-0.62542	-0.718992	-0.656304	0.344792			-1.17837	0.58526	-3.28217	0.741776	-1.00336		0.496442	-0.425951	-0.657129	-0.137749	-0.822642		0.976229	0.58746	0.75401	-0.523833	-0.699504
	IL-6	0.891064	2.20611	0.718013	-0.216049	-0.33037	-0.256679	0.7539	2.01717		1.44437			-1.05456	-1.58931	-1.43781	-0.0488046			-0.0405309	0.616736	-1.22181	0.628739	0.302587		0.649962	-0.930541	-0.916121	-0.170913	-1.42931		0.716954	0.212163	0.398703	-0.783499	-1.13017
	Cxcl9	-0.795459	-0.617672	-0.784859	-0.853374	-0.912253	-0.905035	0.693929	0.293553		0.683356			-0.938591	-0.970101	-0.944296	-0.856881			0.99943	0.851145	1.08494	1.94903	1.96694		-0.81502	-0.938083	-0.999588	-0.881968	-0.990038		0.78978	1.20546	0.696654	0.773386	1.21561
	Cxcl10	-0.589372	-0.703835	-1.01546	-0.788012	-0.736036	-0.926328	1.20825	0.958219		0.995436			-1.01707	-0.898544	-1.25459	-0.754621			0.66798	0.810868	0.688092	1.69842	1.73949		-0.759634	-1.17425	-1.22492	-0.71261	-0.648688		0.112081	1.2849	1.00976	0.756437	1.27406
	CCL3	-2.23635	-0.347835	-0.910092	-1.00257	-0.255616	0.683805	0.159637	-0.496045		0.927028			-2.2602	-0.864407	0.0236203	-1.18188			0.673472	0.954867	2.3054	1.51488	1.18338		-0.00093623	0.293033	-0.543773	0.556348	0.325548		-0.32553	0.17247	-0.291001	0.0905583	0.852185
	CCL4	0.488192	0.407873	0.446123	-1.31626	-1.49438	0.252765	0.659926	0.601171		0.976732			-1.82587	0.115492	0.473878	0.707095			1.40413	0.565412	1.15237	1.06532	1.13396		-0.535774	-1.19974	-1.92482	0.330248	1.04485		-0.199322	-1.0876	0.397898	-1.3792	-1.26048
	IL-1b	-2.03432	-0.50256	-1.18409	-0.588166			1.36176	1.25706	0.961464	1.22573			-0.241479	-0.274995	-0.371989	-0.295576			1.24491	1.32627	1.2366	1.15308			0.159895	-0.7825	-0.255811	-0.652121			-1.386	-1.54833	0.155248	0.0359222
	NLRP3	-2.34622	-0.449509	-1.38857	-0.760624			1.65522	1.53714	0.262473	0.802665			-0.192206	-0.383404	-0.153612	-0.932927			1.52687	1.56465	0.809513	0.665303			-0.0230869	-0.2764	-0.992404	-0.961439			0.716553	0.253005	-0.375197	-0.557799
	ROS	-0.466379	-1.066	-0.691034	-0.307324			1.35589	1.15593	0.382509	0.936173			-1.18638	-1.64822	-0.971442	-0.255201			1.52639	2.08314	1.09458	1.46497			-0.629897	-1.03035	-0.918876	-0.276016			-0.291622	0.312396	-0.239693	-0.333533
	NO	-0.910212	-0.494029	-0.731655	-0.840139	-0.448916		0.973458	0.721674	1.72963	0.878574			-0.729208	-0.632733	-0.572719	-0.22274			1.05901	1.76295	1.54276	2.30294			-1.05512	-0.853115	-0.780343	-0.870867	-1.20523		0.244697	-0.143819	-0.475759	-0.249089
	NOS2	-0.0343604	0.477817	-0.901654	-0.281409	0.386085	0.130402	-1.13644	-1.25002	-1.13579	-0.097424			-0.761669	-0.364408	0.977078	-0.279079			0.271111	2.63579	1.55141	2.01301	1.31342		-0.60405	-1.14175	0.602484	-0.896337	-1.0317		-0.486288	1.1522	-0.655696	0.327007	-0.779729
	IL-4 (protein)	1.1004	2.40293	1.20499	-0.160013	-0.490344	-0.216042	0.625105	1.95486		1.22152			-0.809661	-1.20783	-1.06303	0.0785975			-0.309927	0.654969	-1.63178	-0.174	-0.226867		0.443109	-0.844222	-1.03592	0.0552053	-0.951914		0.745156	0.256109	0.748638	-0.916075	-1.45396
	IL-10	0.271601	0.207557	-0.174157	-1.13171	-1.27949	0.370499	0.826965	-0.393133		0.754219			-1.51097	0.419511	0.950232	0.938585			1.52035	0.691001	1.35379	1.15722	1.22881		-0.477139	-1.04848	-1.71508	0.0976017	1.61078		-1.00487	-0.9172	-0.383035	-1.09993	-1.26352
	CCL2	-0.168266	0.270653	-0.181129	-0.517638	-0.611617	-0.60163	-0.14568	0.257998		1.3275			-0.629186	-0.898338	-0.84557	-0.437374			1.74864	0.824354	-0.815739	1.52949	2.28536		-0.267765	-0.786082	-0.760321	-0.428732	-0.427473		-0.0382736	1.40409	-2.00821	-0.738133	1.65907
	GM-CSF	0.158417	0.704594	0.0208289	-0.22902	0.455709	-0.447069	0.00294197	0.821159		2.55618			-0.676607	-0.779342	-0.671105	-0.363573			-0.403772	0.0577505	-0.862097	-0.34394	-0.307146		-0.0591372	-0.646876	-0.76552	-0.343705	3.83195		-0.00959425	-0.0667939	-0.0784499	-0.711545	-0.844242
	VEGF	-3.19255	-2.69562	-0.801591	0.267263	0.534424	0.513598	0.512376	-1.51669		0.465394			0.573675	0.248347	0.655576	0.419564			0.217245	-0.329145	0.853865	0.877298	0.359639		-0.217903	0.83869	0.404099	-0.0405498	0.644016		-1.24743	0.371475	0.146043	0.460681	0.678218
	YMY1	-0.568991	-0.550263	-0.552194	-0.455842	-0.276075	-0.451299	-0.360626	-0.558056	-0.53281	1.3462			-0.563493	-0.530459	-0.459707	-0.090603			1.03504	0.994035	3.14359	1.93201	2.45652		-0.554437	-0.567464	-0.553057	-0.553216	-0.568929		-0.455299	-0.335149	-0.484128	-0.493699	-0.391591
	IL-4 (gene)	-0.733042	-0.341573	0.309331	-0.739222	-0.117626	-0.714477	-0.736398	-0.7339	-0.343038	-0.731815			-0.102413	0.777141	-0.679853	1.27565			-0.654139	-0.143942	-0.681246	0.23116	0.698187		-0.526664	0.514174	-0.734259	0.353199	-0.62455		-0.377349	3.9549	-0.661523	0.457216	1.80607
	FIZZ2	-0.464192	1.25916	1.62174	-0.707338	0.0414158	0.279146	-0.879899	-0.887746	-0.854551	0.128662			0.112566	1.97485	-0.548923	2.93524			-0.750341	-0.844798	-0.88211	-0.900174	-0.881682		-0.118813	1.00584	0.596274	1.41483	-0.592901		-0.0118766	-0.809541	-0.851107	-0.0928381	-0.290892
		Ctrl.		Ifnar1-/-		Casp1-/-
	D	STING WT	STING ki	STING WT	STING ki	STING WT	STING ki		Adult mice with Bl6, Ifnar1-/- or Casp1-/- background, normalized Iba-1 area fraction
		0.961321	11.7027	1.4544	7.76867	1.25586	5.11525
		0.755243	8.39388	1.7846	4.84525	1.0707	3.17438
		1.12592	8.7883	1.66144	6.63295	1.72848	4.42047
		1.24486	9.81187	1.58503	5.04414	1.26519	3.34218
		0.912661	7.87511	1.57645	6.76703	1.53618	4.02972
					3.62664
		Ctrl.		Ifnar1-/-		Casp1-/-
	E	STING WT	STING ki	STING WT	STING ki	STING WT	STING ki		Adult mice with Bl6, Ifnar1-/- or Casp1-/- background, normalized GFAP area fraction
		0.764782	25.0505	1.27622	30.5754	1.05277	4.15398
		1.21922	27.7284	1.13676	18.3898	1.02194	4.20893
		1.13489	26.7267	1.14861	16.646	1.07663	4.87472
		0.917651	27.8511	0.843596	16.5925	1.20593	5.96314
		0.963459	24.2651	1.56376	14.8585	1.31692	3.85444
					15.0433

## Sheet: Figure 8
Szegö et al,	Constitutively active STING causes neuroinflammation and degeneration of dopaminergic neurons in mice
		Ctrl.		Ifnar1-/-		Casp1-/-
Figure 8.	A	STING WT	STING ki	STING WT	STING ki	STING WT	STING ki		Adult mice with Bl6, Ifnar1-/- or Casp1-/- background, mitochondrial ROS
		0.96571	1.15409	0.91815	1.31687	0.98948	1.09008
		0.96754	1.06081	0.9968	1.20165	1.04252	1.05716
		1.00777	1.1102	1.03338	1.1669	1.02606	1.11751
		1.05898	1.20713	0.99863	1.19433	0.96936	1.03887
		Ctrl.		Ifnar1-/-		Casp1-/-
	B	STING WT	STING ki	STING WT	STING ki	STING WT	STING ki		Adult mice with Bl6, Ifnar1-/- or Casp1-/- background, cytoplasmic ROS
		1.02773	1.40507	0.90827	1.44679	0.99929	1.05902
		0.92723	1.35767	0.83906	1.59185	0.93292	1.17469
		0.98886	1.18891	0.9424	1.34345	0.95094	1.0685
		1.05617	1.30742	1.06566	1.43162	1.06186	1.05143
		Ctrl.		Ifnar1-/-		Casp1-/-
	B	STING WT	STING ki	STING WT	STING ki	STING WT	STING ki		Adult mice with Bl6, Ifnar1-/- or Casp1-/- background, Nitrite levels
		0.282526	1.06579	0.35779	1.10136	0.222269	0.762756
		0.455581	0.96109	0.397906	1.39407	0.306268	0.601204
		0.356773	1.38021	0.422861	1.30251	0.336528	0.463179
		0.311664	1.02633	0.568388	1.61861	0.298886	0.557432
		0.47434				0.159855

## Sheet: Figure 9
Szegö et al,	Constitutively active STING causes neuroinflammation and degeneration of dopaminergic neurons in mice
		Ctrl.		Ifnar1-/-		Casp1-/-
Figure 9.	B	STING WT	STING ki	STING WT	STING ki	STING WT	STING ki		Adult mice with Bl6, Ifnar1-/- or Casp1-/- background, normalized TH-fiber density
		0.951155	0.794865	0.90326	0.841663	0.853798	0.795231
		1.03895	0.803658	0.919882	0.818344	0.812609	0.754508
		0.913974	0.784895	0.871144	0.870204	0.88815	0.762155
		1.08357	0.826804	0.959181	0.877016	0.855037	0.719279
		1.01235	0.795662	0.917996	0.863187	0.81816	0.789397
					0.812308
		Ctrl.		Ifnar1-/-		Casp1-/-
	C	STING WT	STING ki	STING WT	STING ki	STING WT	STING ki		Adult mice with Bl6, Ifnar1-/- or Casp1-/- background, normalized striatal dopamine
		1.38176	0.539134	0.895799	0.672524	0.934328	0.670195
		0.860457	0.679038	1.18676	0.830624	1.06567	0.846765
		1.12816	0.329298	0.917444	0.899109	1.19673	0.749579
		1.01059	0.899826			1.10074	0.831751
		0.619034	0.528729			1.048	0.76846
		1.04421	0.503101			0.971519	0.789768
		0.958774	0.392552			0.841245
		0.997019				0.917194
						0.924578

## Sheet: Figure 1 - figure supplement 1
Szegö et al,	Constitutively active STING causes neuroinflammation and degeneration of dopaminergic neurons in mice
Figure 1. - figure supplement 1
	A	STING WT	STING ki		Adult mice, Number of Iba1-positive cells, striatum
		55.89	163.53
		33.12	192.51
		46.575	176.985
		70.38	189.405
		27.945	149.04
	B	STING WT	STING ki		Adult mice, Number of GFAP-positive cells, striatum
		8.165	195.75
		13.5	82.35
		24.63	105.3
		17.55	63.45
		20.889	122.85
	D	STING WT	STING ki		Adult mice, Number of dopaminergic neurons, substantia nigra
		15606	14315
		16470	14800
		15940	15570
		14695	13965
		15654	14112.9
	E	STING WT	STING ki		Adult mice, dopamine metabolism
		0.92173	1.00723
		1.01186	1.39981
		0.924463	1.53246
		1.05322	1.24309
		1.08873	1.74475
	F	STING WT	STING ki		Adult mice, GFAP area fraction, substantia nigra
		0.433129	3.1344
		1.51595	5.2207
		1.2779	6.67052
		0.463713	2.80212
		1.30931	4.44599
	G	STING WT	STING ki		Adult mice, Iba1 area fraction, substantia nigra
		0.347515	5.39666
		0.279767	7.3445
		1.07414	6.13978
		1.92046	6.70212
		1.37812	5.96325
	H	STING WT	STING ki		Adult mice, number of GFAP-positive cells, substantia nigra
		0.615	9.84
		3.69	16.605
		1.845	14.76
		7.995	15.375
		2.46	12.3
	I	STING WT	STING ki		Adult mice, number of Iba1-positive cells, substantia nigra
		9.225	67.925
		5.535	81.51
		25.83	87.78
		36.125	79.42
		29.52	73.15

[truncated: 8 more sheets: Figure 2- figure supplement 1, Figure 3 - figure supplement 1, Figure 4- figure supplement 1, Figure 5 - fgure supplement 1, Figure 6 - figure supplement 1, Figure 7 - figure supplement 1, Figure 7 - figure supplement 2, Figure 9 - figure supplement 1]
