# Supplementary material for: Constitutively active STING causes neuroinflammation and degeneration of dopaminergic neurons in mice
Source: eLife journal article supplement (doi:10.7554/elife.81943), 2022-10-31
Supplement: supp [file F6S1A.pdf › F6S1 source data/F6S1A.pdf]

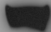

1. Name  
2. Address  
3. City  
4. State

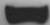

1. Name  
2. Address  
3. City  
4. State

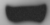

1. Name  
2. Address  
3. City  
4. State

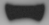

1. Name  
2. Address  
3. City  
4. State

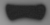

1. Name  
2. Address  
3. City  
4. State

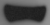

1. Name  
2. Address  
3. City  
4. State
