# Supplementary figures and images for: Constitutively active STING causes neuroinflammation and degeneration of dopaminergic neurons in mice
Source: eLife journal article supplement (doi:10.7554/elife.81943), 2022-10-31

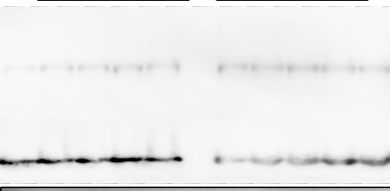

Supplement: fig3-figsupp1-data1 [file elife-81943-fig3-figsupp1-data1-v2.zip]

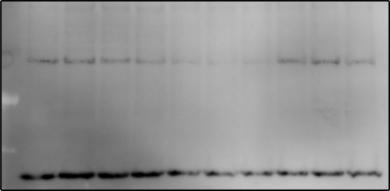

Supplement: fig3-figsupp1-data1 [file elife-81943-fig3-figsupp1-data1-v2.zip]

Figure 1 - supplement 1

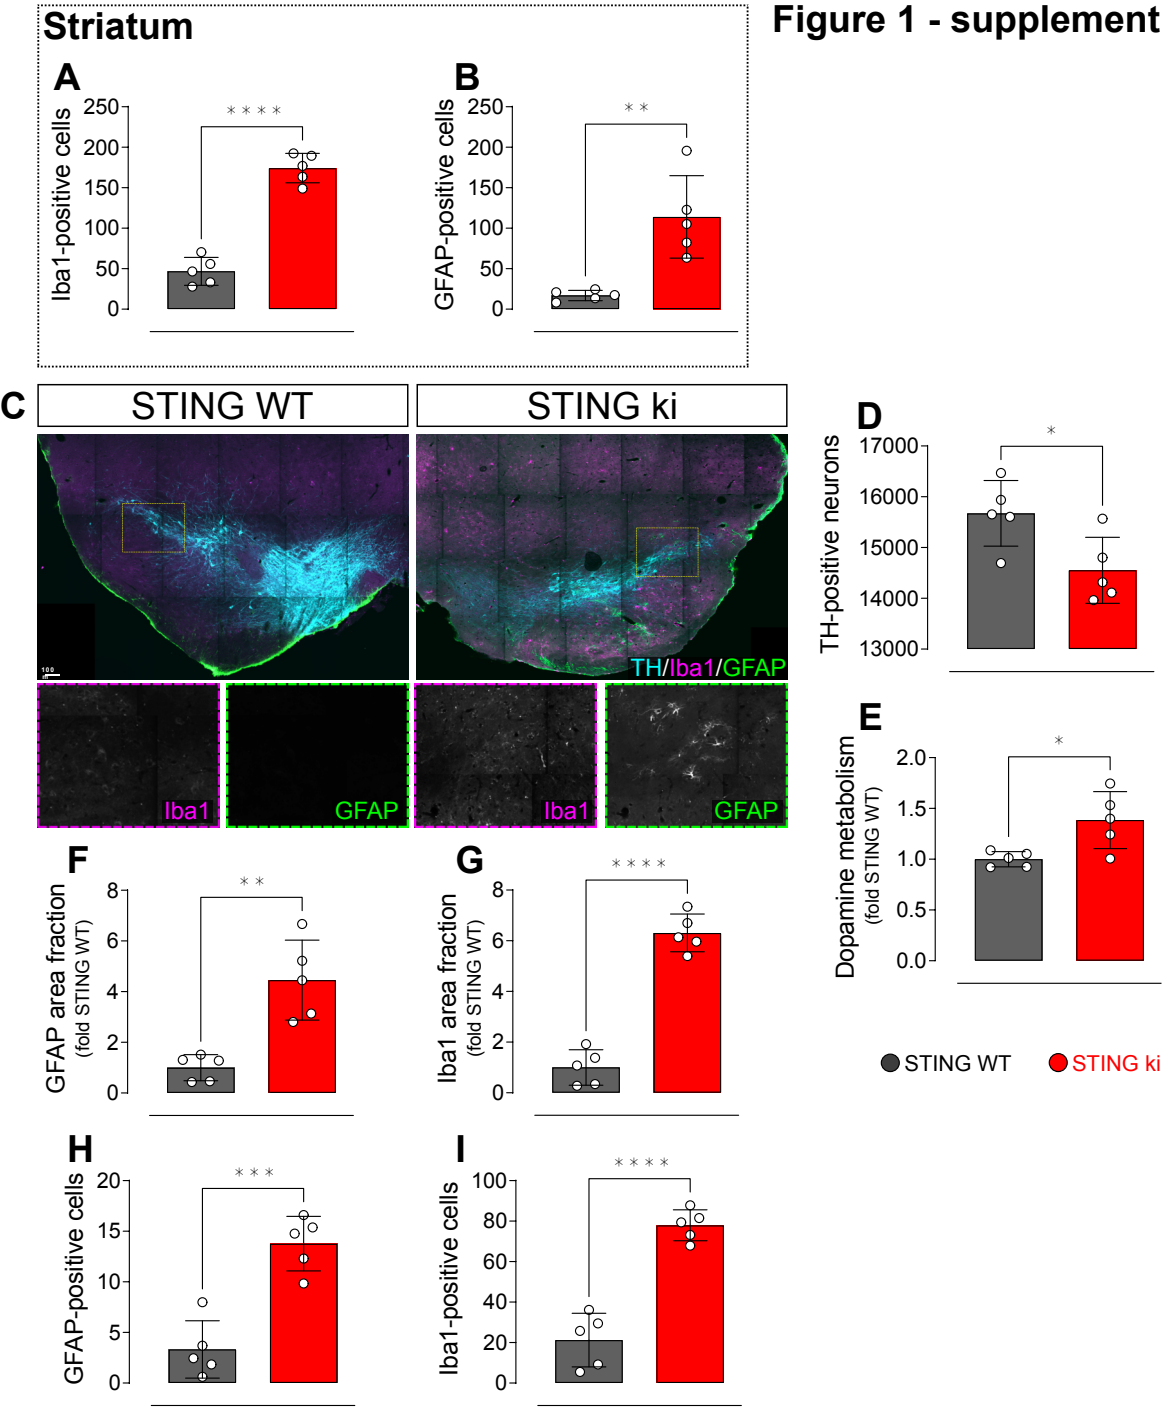

Supplement: supp [file elife-81943-supp-v1.zip › elife_poa_e81943_Figure_1_figure_supplement_1.pdf]

**Figure 2 - supplement 1**

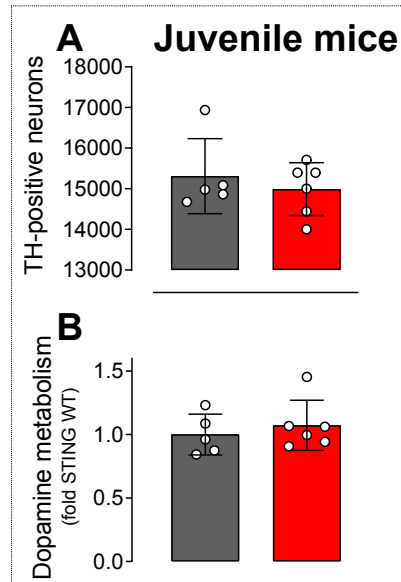

Supplement: supp [file elife-81943-supp-v1.zip › elife_poa_e81943_Figure_2_figure_supplement_1.pdf]

**Figure 3 - figure supplement 1**

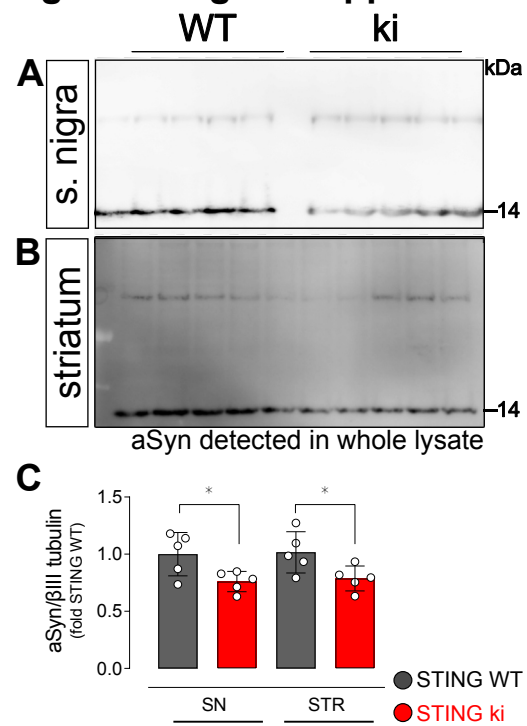

Supplement: supp [file elife-81943-supp-v1.zip › elife_poa_e81943_Figure_3_figure_supplement_1.pdf]

Figure 4 - figure supplement 1

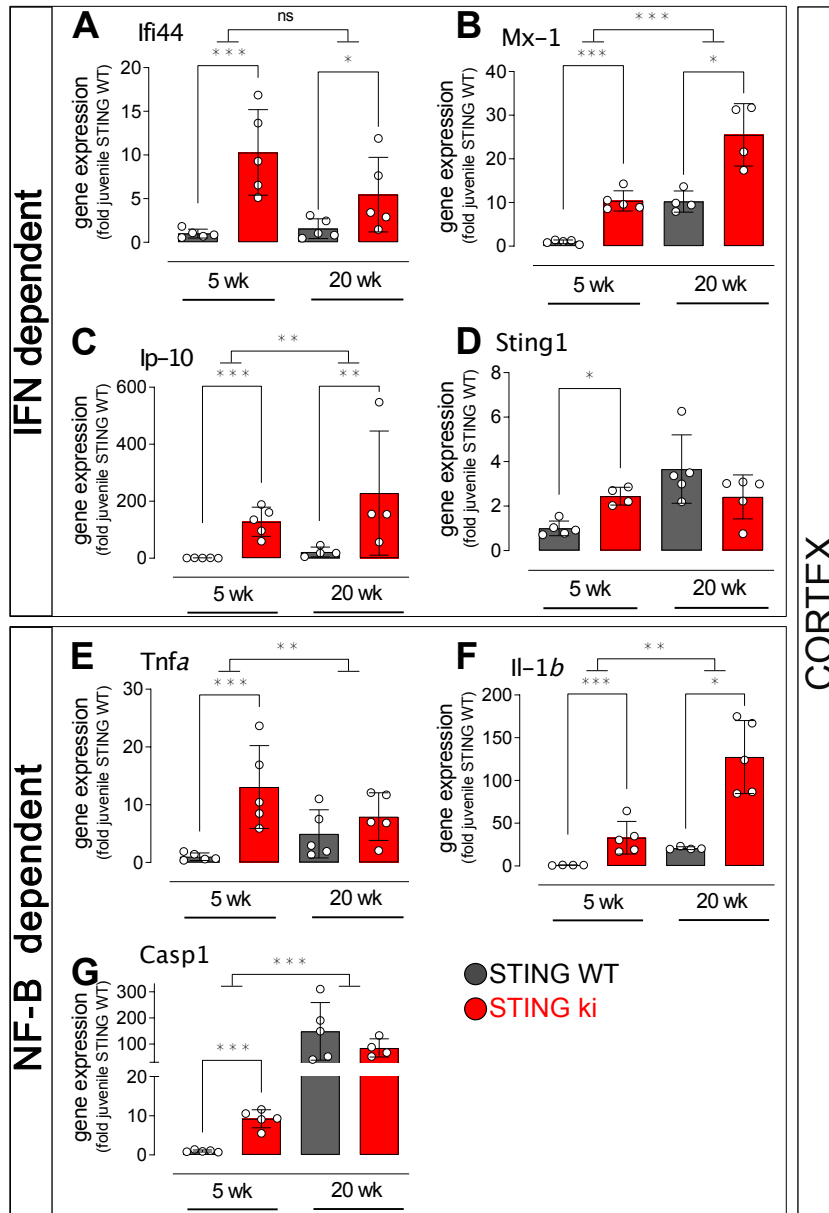

Supplement: supp [file elife-81943-supp-v1.zip › elife_poa_e81943_Figure_4_figure_supplement_1.pdf]

Figure 5 - figure supplement 1

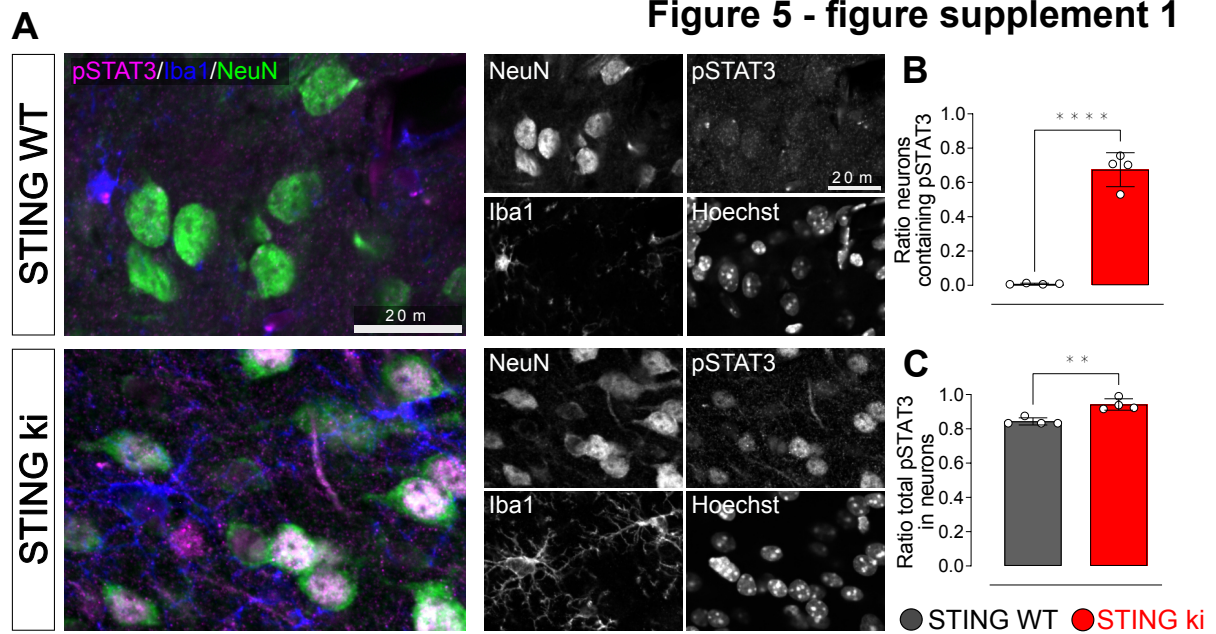

Supplement: supp [file elife-81943-supp-v1.zip › elife_poa_e81943_Figure_5_figure_supplement_1.pdf]

### Figure 6 - figure supplement 1

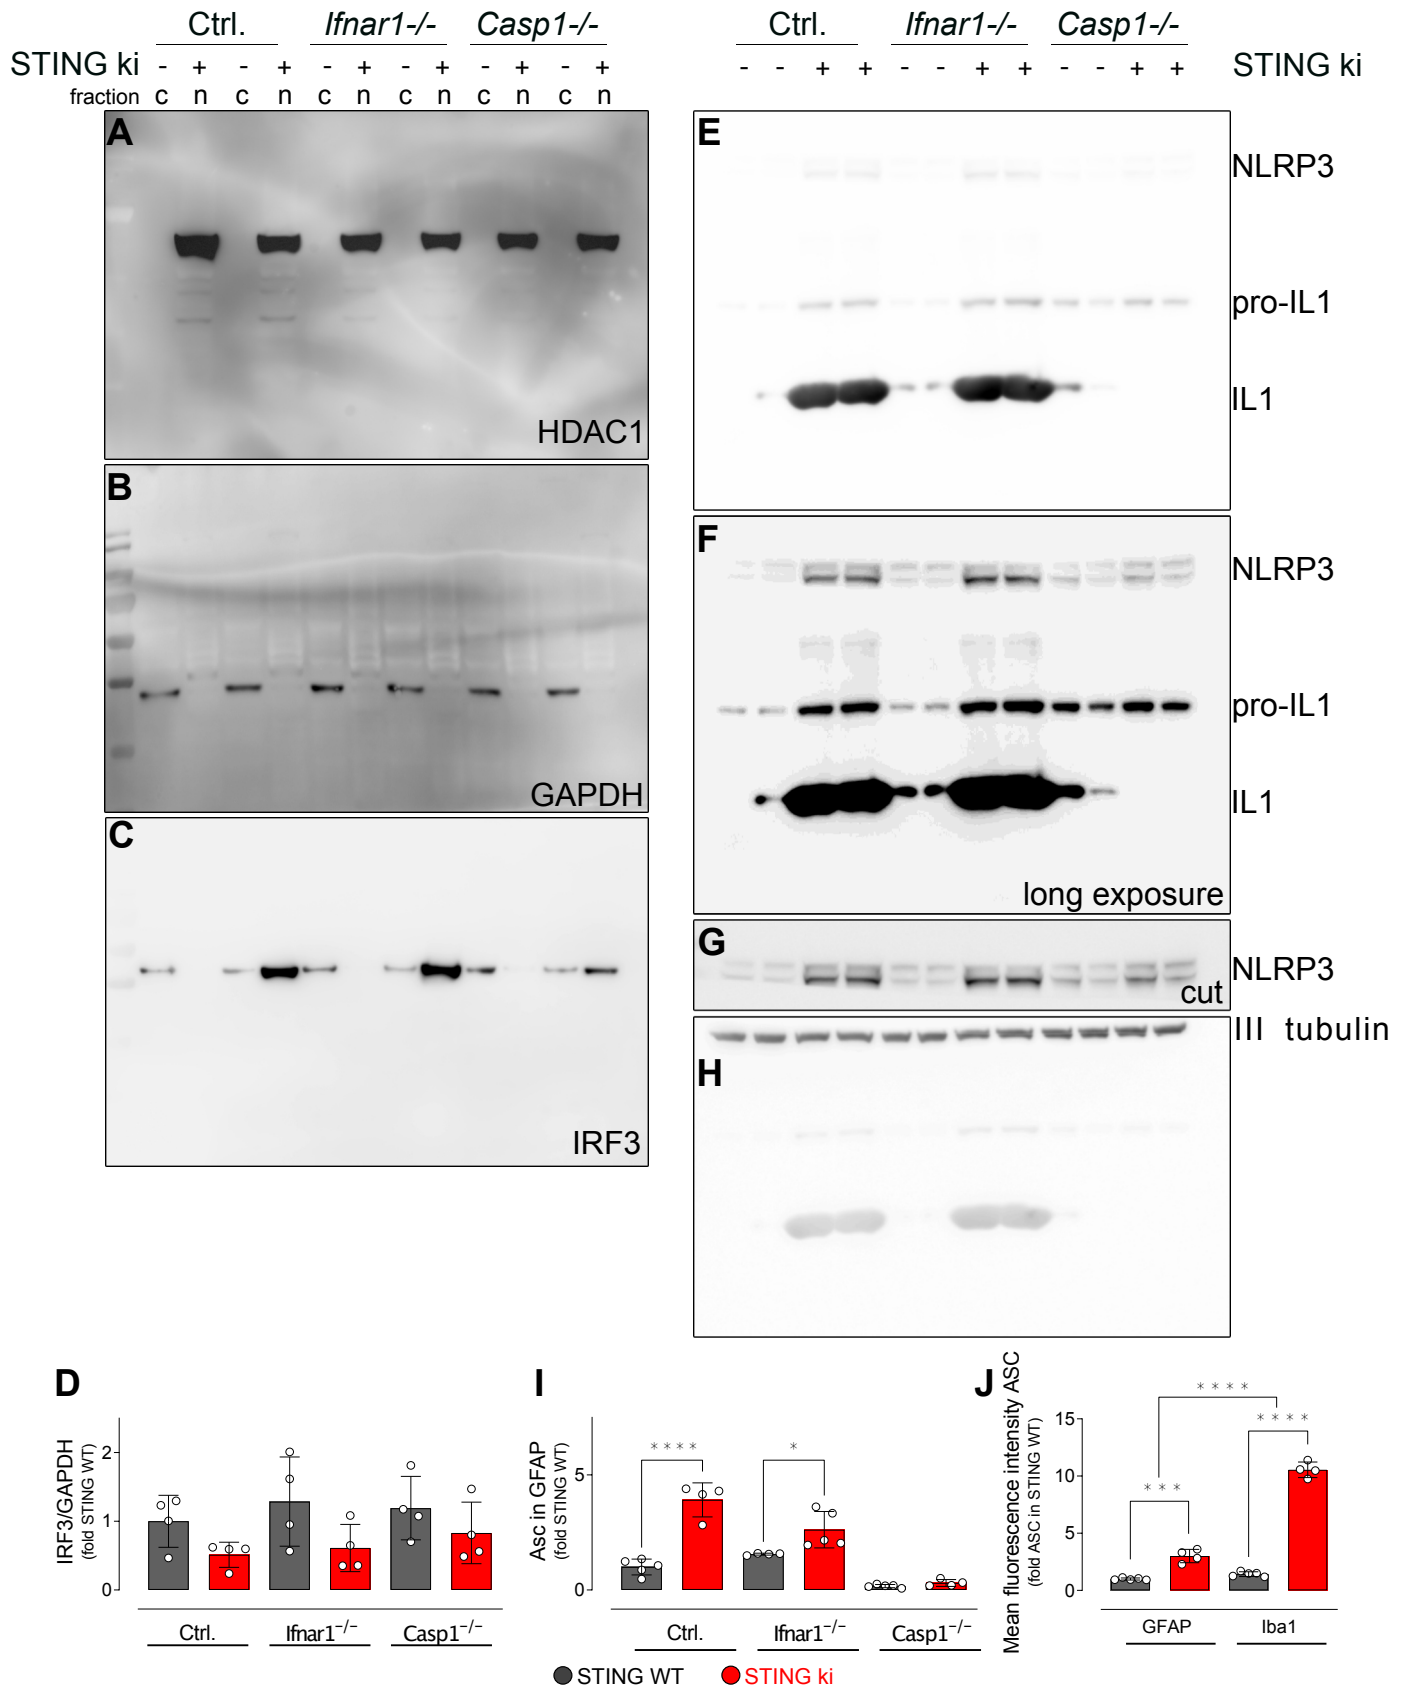

Supplement: supp [file elife-81943-supp-v1.zip › elife_poa_e81943_Figure_6_figure_supplement_1.pdf]

Figure 7 - figure supplement 1

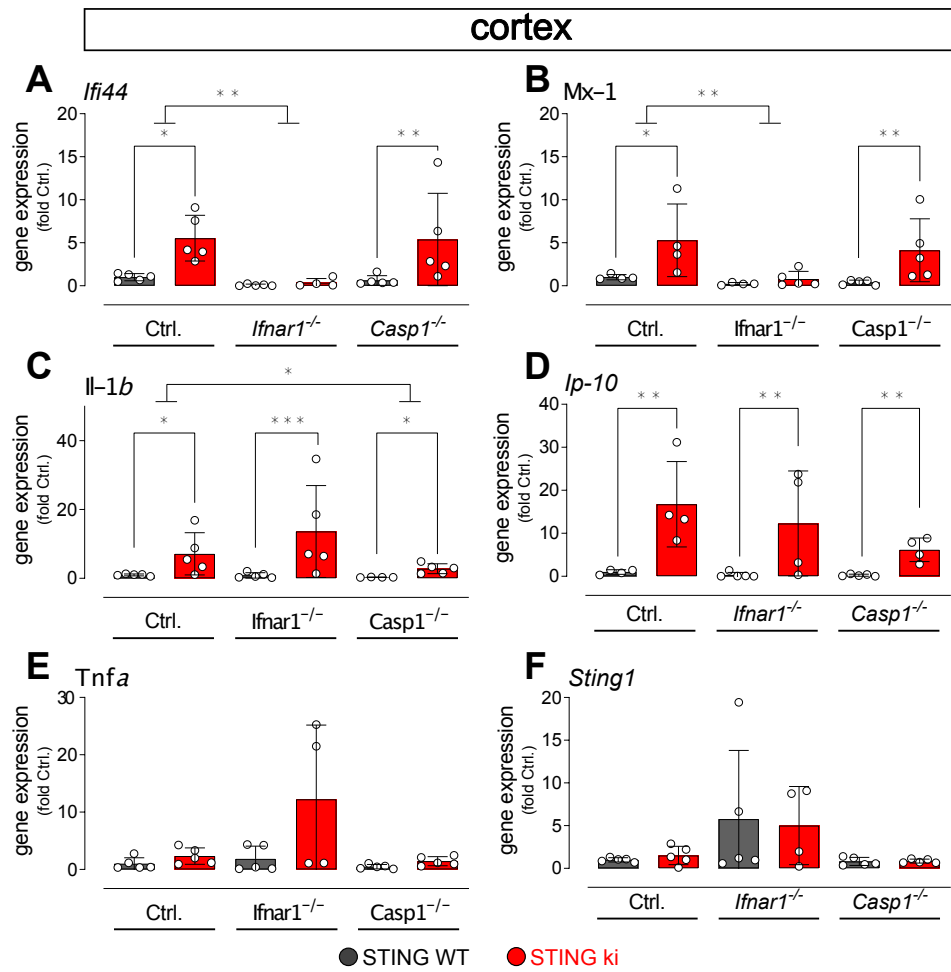

Supplement: supp [file elife-81943-supp-v1.zip › elife_poa_e81943_Figure_7_figure_supplement_1.pdf]

Figure 7 - figure supplement 2

striatum

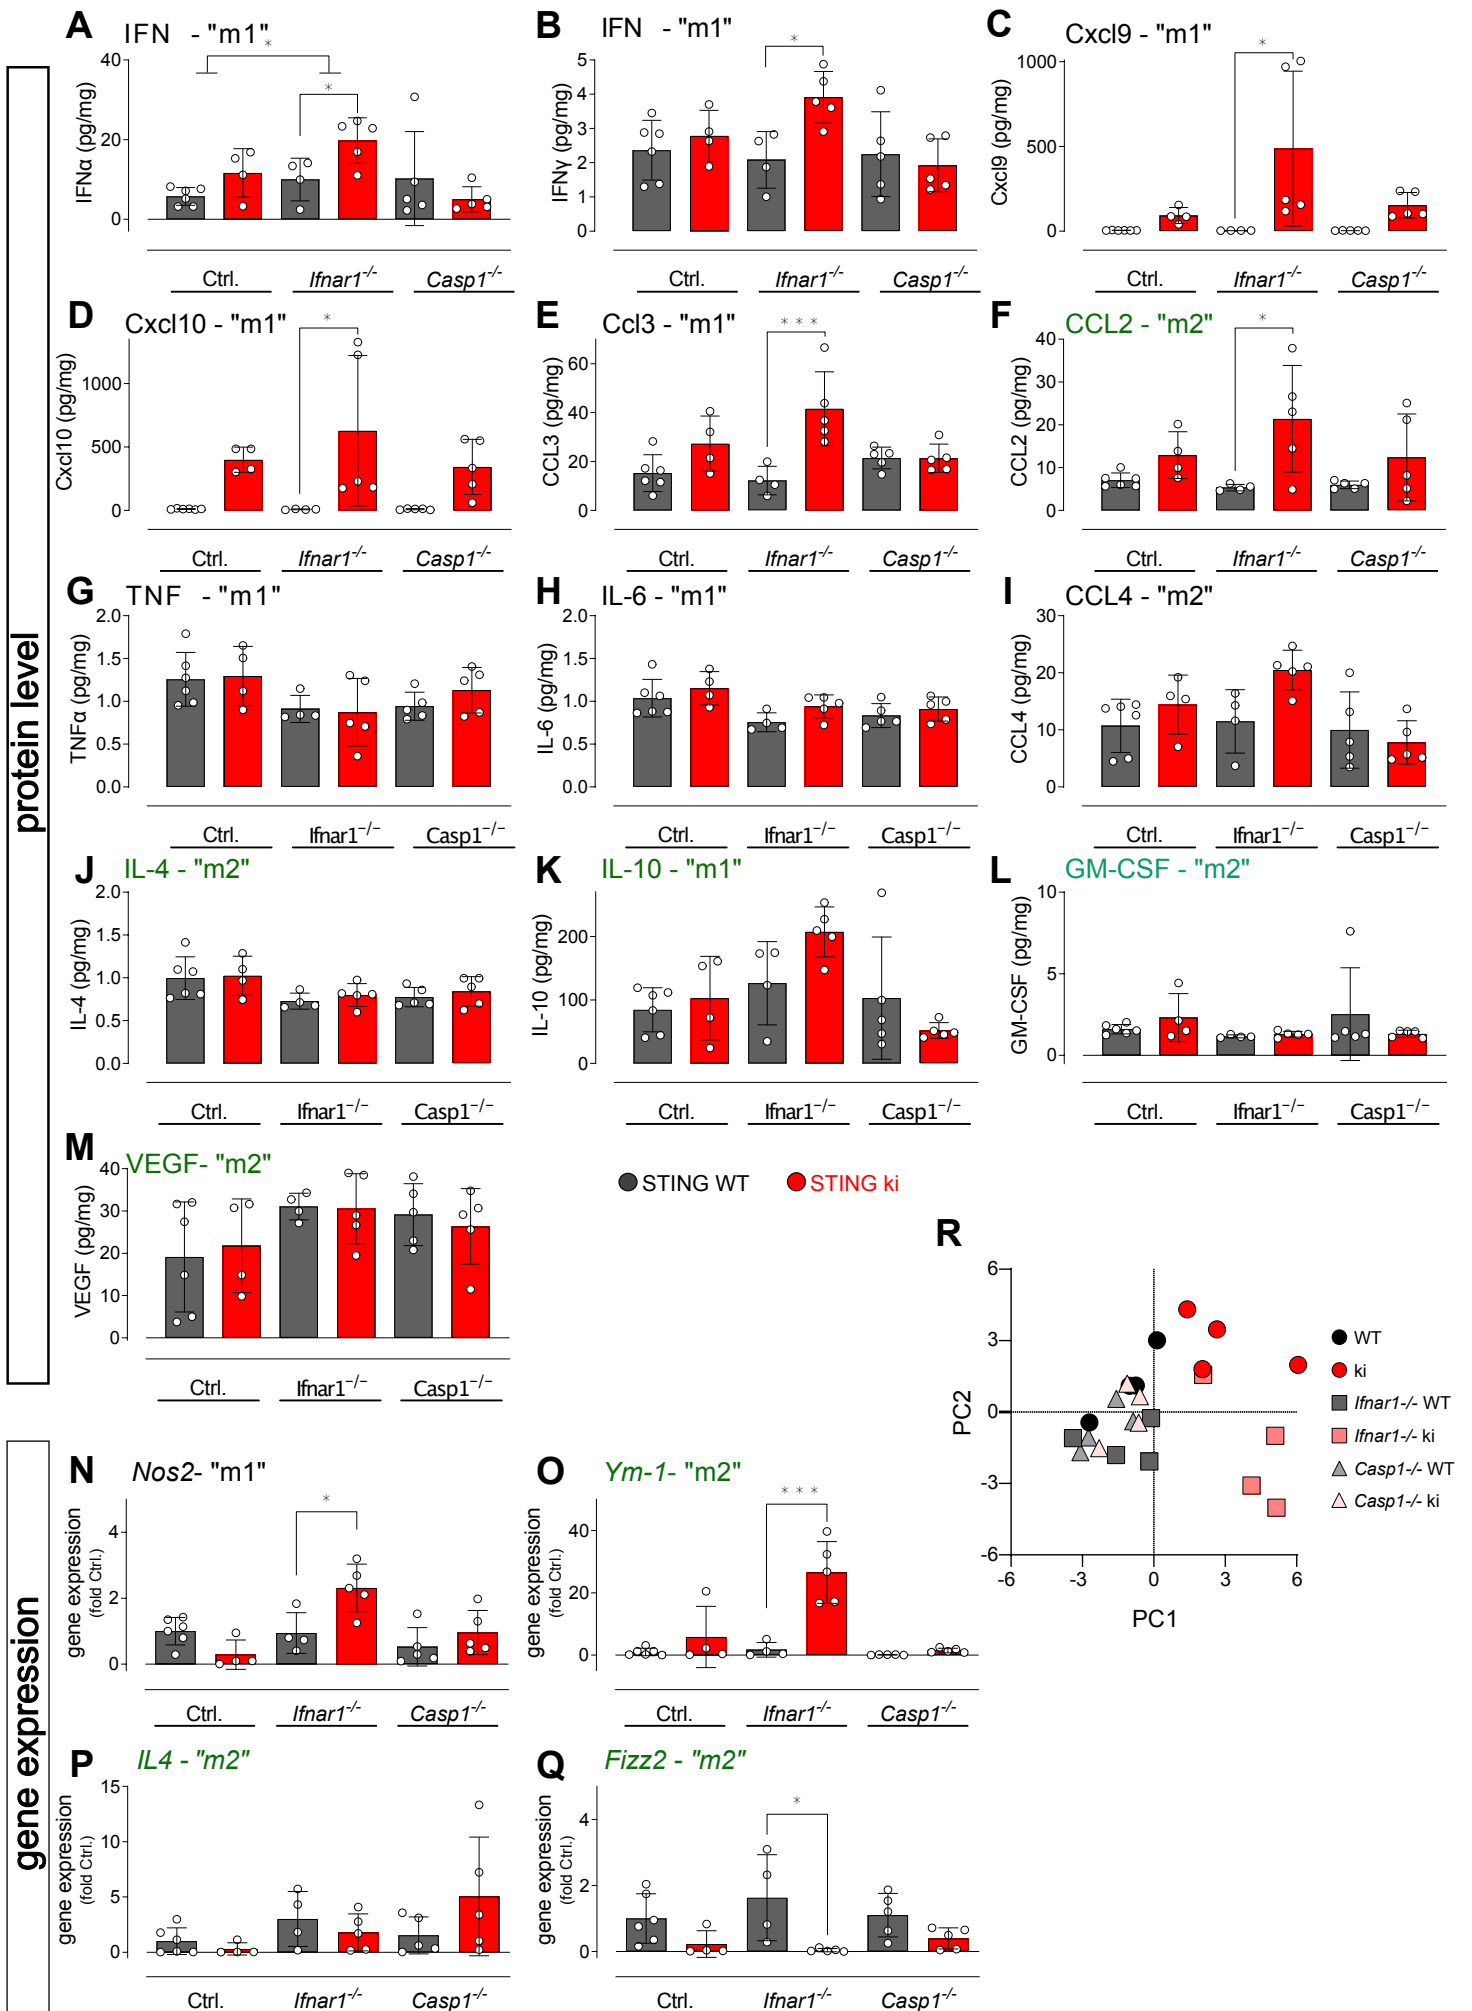

Supplement: supp [file elife-81943-supp-v1.zip › elife_poa_e81943_Figure_7_figure_supplement_2.pdf]

Figure 9 - figure supplemer

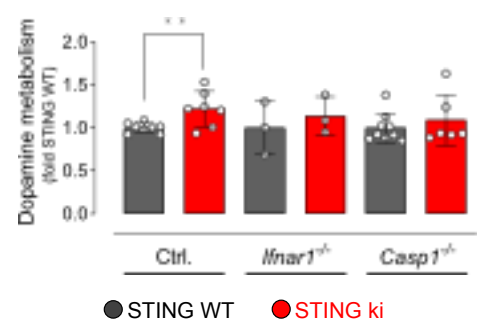

Supplement: supp [file elife-81943-supp-v1.zip › elife_poa_e81943_Figure_9_figure_supplement_1.pdf]

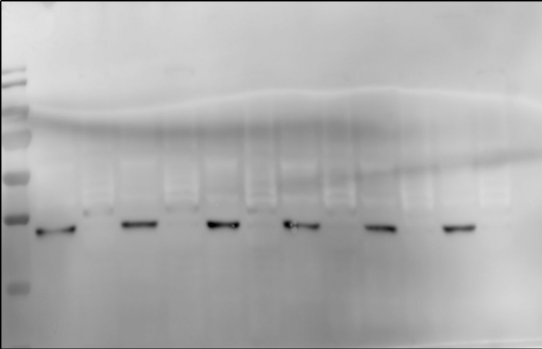

Supplement: supp [file F6S1B.pdf › F6S1 source data/F6S1B.pdf]

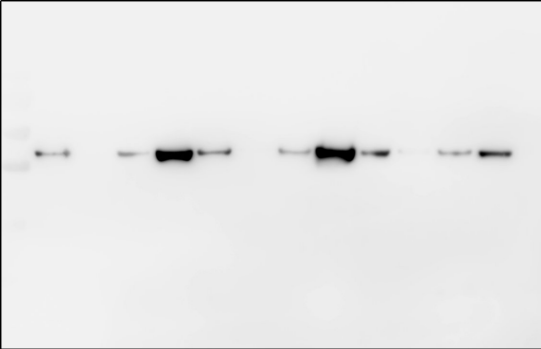

Supplement: supp [file F6S1C.pdf › F6S1 source data/F6S1C.pdf]

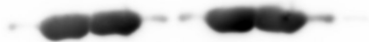

Supplement: supp [file F6S1E.pdf › F6S1 source data/F6S1E.pdf]

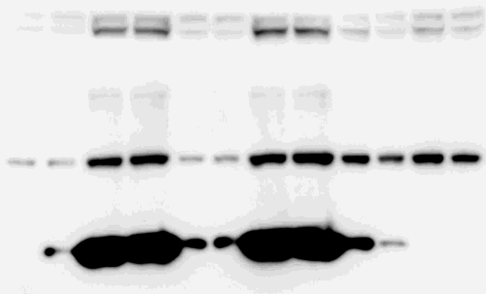

Supplement: supp [file F6S1F.pdf › F6S1 source data/F6S1F.pdf]

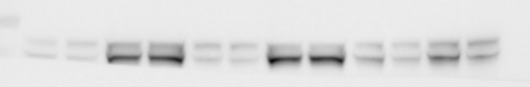

Supplement: supp [file F6S1G.pdf › F6S1 source data/F6S1G.pdf]

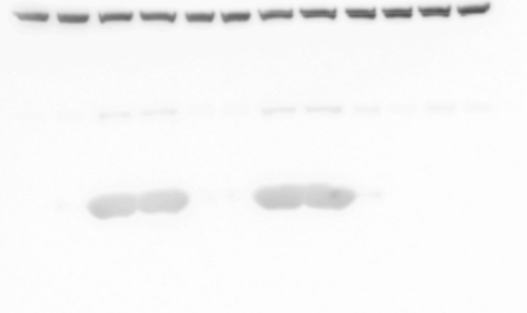

Supplement: supp [file F6S1H.pdf › F6S1 source data/F6S1H.pdf]
